# Supplementary material for: A B-site doped perovskite ferrate as an efficient anode of a solid oxide fuel cell with in situ metal exsolution
Source: Royal Society of Chemistry journal article supplement (doi:10.1039/c9ta09916f), 2019-01-01
Supplement: c9ta09916f1.pdf [file c9ta09916f1.pdf]

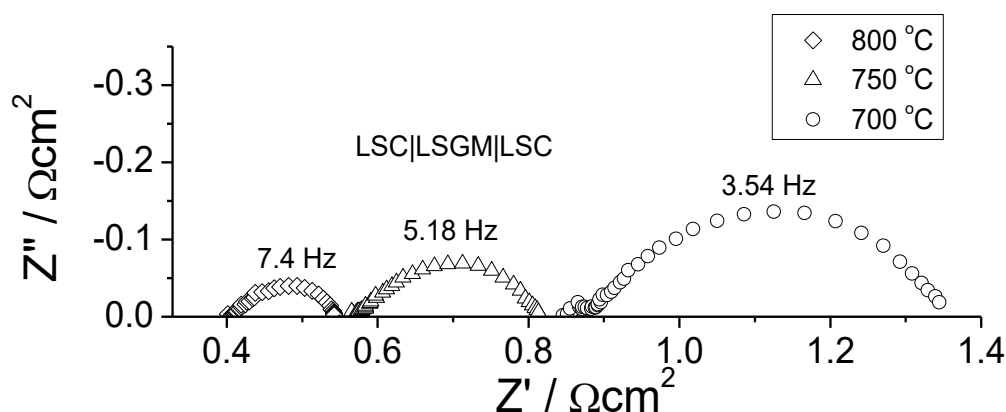

Figure S1. EIS of the LSC cathode at different temperatures in ambient air.

Table 1. Oxygen stoichiometry per formula in reduced perovskite calculated from XPS and TGA.

|             | $M_w^a$ | Weight loss | Calculated oxygen content after reduction |      |            |
|-------------|---------|-------------|-------------------------------------------|------|------------|
|             |         |             | TGA                                       | XPS  | Difference |
| <b>LFM</b>  | 229.50  | 0.84%       | 2.88                                      | 2.79 | -0.09      |
| <b>LFMT</b> | 223.00  | 0.61%       | 2.91                                      | 2.84 | -0.07      |
| <b>LFNT</b> | 235.00  | 0.82%       | 2.88                                      | 2.82 | -0.06      |

**$\alpha$ : Formula weight with stoichiometric oxygen**

### Fitting and analysis of impedance spectra

In order to further investigate the effect of ceria and Pd on the oxidation process of  $H_2$  on the electrode, the EIS of the whole cell was fitted with a modular circuit containing two serial Voigt elements and an  $R_s$  and the circuit can be written

as  $R_s(Q_1R_1)(Q_2R_2)$ . A constant phase element,  $Q$ , is used to replace the capacitance because of the dispersion effect and its impedance,  $Z$ , can be expressed as:

$$Z = 1/Y(j\omega)^{-n} \quad (1)$$

where  $Y$  has the numerical value of the admittance ( $1/|Z|$ ) when the angular velocity,  $\omega$ , is equal to  $1 \text{ rad s}^{-1}$  and  $n$  is a constant. When  $n=1$ ,  $Q$  is equivalent to a capacitance.

Two arcs with characteristic frequency at 123 Hz and 5.3 Hz can be distinguished from the cell with LFNT-Pd anode while only one arc at 123 Hz or 3.5 Hz was distinguishable in the cell with LFNT or LFNT-ceria anode at  $700 \text{ }^\circ\text{C}$  (**Figure 8 in main text**), respectively. The arc with a characteristic frequency at 123 Hz could be related to the charge transfer of oxide ion or electrons between the surface of electrode<sup>1</sup>. The cell performance of the cell with LFNT anode is limited by the charge transfer of the process. With the addition of ceria, the arc at 123 Hz is indistinguishable and this could be related to the high ionic conductivity of ceria under a reducing atmosphere and the cell performance is limited by the dissociative adsorption of gaseous species and surface diffusion. With the infiltration of additional Pd, both the charge transfer and the surface reaction are important to the oxidation kinetics of  $\text{H}_2$ . The contribution of impedance from the LSC cathode shows a characteristic frequency at 7.4 to 3.5 Hz, which can also contribute to the arc at either high or low frequency.

**Table 2. Fitting parameters of the EIS under a model containing to consecutive Voigt elements.**

|         | Te  | $R_s$               | $Y_1$                                    | $n_1$ | $R_1$               | $Y_2$                                    | $n_2$ | $R_2$               |
|---------|-----|---------------------|------------------------------------------|-------|---------------------|------------------------------------------|-------|---------------------|
|         | °C  | $\Omega\text{cm}^2$ | $\Omega^{-1}\text{S}^{-n}\text{cm}^{-2}$ |       | $\Omega\text{cm}^2$ | $\Omega^{-1}\text{S}^{-n}\text{cm}^{-2}$ |       | $\Omega\text{cm}^2$ |
| LFNT    | 700 | 0.54                | $7.34 \times 10^{-3}$                    | 0.74  | 0.88                |                                          |       |                     |
|         | 750 | 0.38                | $7.34 \times 10^{-3}$                    | 0.76  | 0.69                |                                          |       |                     |
|         | 800 | 0.29                | $9.37 \times 10^{-3}$                    | 0.75  | 0.41                |                                          |       |                     |
| LFNT+Ce | 700 | 0.47                |                                          |       |                     | 0.15                                     | 0.73  | 0.70                |
|         | 750 | 0.33                |                                          |       |                     | 0.22                                     | 0.68  | 0.40                |
|         | 800 | 0.25                |                                          |       |                     | 0.30                                     | 0.65  | 0.31                |
| LFNT+Pd | 700 | 0.50                | $2.72 \times 10^{-3}$                    | 0.98  | 0.43                | 0.14                                     | 0.49  | 0.52                |
|         | 750 | 0.36                | $3.45 \times 10^{-3}$                    | 0.95  | 0.31                | 0.24                                     | 0.47  | 0.29                |
|         | 800 | 0.26                | $8.83 \times 10^{-3}$                    | 0.79  | 0.34                | 4.21                                     | 0.66  | 0.06                |

1. L. Lu, C. Ni, M. Cassidy and J. T. S. Irvine, *J. Mater. Chem. A*, 2016, **4**, 11708-11718.
